# Supplementary material
Source: PubMed Central journal article supplement (PMC7193684)
Supplement: NIHMS1581592-supplement-supplementary_appendix.pdf [file NIHMS1581592-supplement-supplementary_appendix.pdf]

**Supplementary Appendix**

**Nivolumab Plus Ipilimumab in Advanced Non–Small-Cell Lung Cancer**

## Table of Contents

|                                                                                                                                                                                                                      |    |
|----------------------------------------------------------------------------------------------------------------------------------------------------------------------------------------------------------------------|----|
| List of CheckMate 227 Part 1 Investigators .....                                                                                                                                                                     | 3  |
| Supplemental Methods.....                                                                                                                                                                                            | 7  |
| Figure S1. Study Design .....                                                                                                                                                                                        | 9  |
| Figure S2. Consolidated Standards of Reporting Trials (CONSORT) Diagram of Patient Disposition .....                                                                                                                 | 11 |
| Figure S3. Scatterplot of TMB and PD-L1 Expression in All TMB-Evaluable Patients <sup>a</sup> .....                                                                                                                  | 12 |
| Figure S4. Progression-free Survival With Nivolumab Plus Ipilimumab Versus Chemotherapy in All Randomized and TMB-Evaluable Patients.....                                                                            | 13 |
| Figure S5. Progression-free Survival With Nivolumab Plus Ipilimumab Versus Chemotherapy in Patients With TMB <10 Mutations/Mb .....                                                                                  | 14 |
| Figure S6. Progression-free Survival With Nivolumab Monotherapy Versus Chemotherapy in Patients With TMB $\geq$ 13 Mutations/Mb and $\geq$ 1% Tumor PD-L1 Expression .....                                           | 15 |
| Figure S7. Progression-free Survival With Nivolumab Plus Ipilimumab Versus Nivolumab Monotherapy and Chemotherapy <sup>a</sup> in Patients With TMB $\geq$ 10 Mutations/Mb and $\geq$ 1% Tumor PD-L1 Expression..... | 16 |
| Figure S8. Treatment-Related Select Adverse Events <sup>a</sup> by Category With Nivolumab Plus Ipilimumab.....                                                                                                      | 17 |
| Table S1. Sample Size Throughout TMB Determination.....                                                                                                                                                              | 18 |
| Table S2. Baseline Characteristics of All Randomized and TMB-Evaluable Patients.....                                                                                                                                 | 19 |
| Table S3. End-of-Treatment Summary.....                                                                                                                                                                              | 20 |
| Table S4. Subsequent Systemic Therapies in Patients With TMB $\geq$ 10 Mutations/Mb <sup>a</sup> .....                                                                                                               | 21 |
| Table S5. Treatment-Related Adverse Events Leading to Discontinuation of Nivolumab Plus Ipilimumab in $\geq$ 2 Patients.....                                                                                         | 22 |
| Table S6. Treatment-Related Adverse Events Leading to Discontinuation of Nivolumab Monotherapy in $\geq$ 2 Patients .....                                                                                            | 23 |
| Table S7. Treatment-Related Adverse Events Leading to Discontinuation of Chemotherapy in $\geq$ 2 Patients.....                                                                                                      | 24 |
| Table S8. Treatment-Related Serious Adverse Events in $\geq$ 2% of Patients .....                                                                                                                                    | 25 |
| References.....                                                                                                                                                                                                      | 26 |

## List of CheckMate 227 Part 1 Investigators

**Argentina:** Santiago Bella (Clinica Privada Universitaria Reina Fabiola), Carlos Brocca (Hospital Privado Centro Medico De Cordoba), Marcos Flores (Hospital Privado de Comunidad), Ernesto Korbenfeld (Fundacion Investigar), Ruben Kowalyszyn (Clinica Viedma S.A.), Lorena Lupinacci (Hospital Italiano De Buenos Aires), Claudio Martin (Instituto Alexander Fleming), Eduardo Richardet (Instituto Oncologico de Cordoba), Mirta Susana Varela (COIBA), Juan Zarba (Centro Medico San Roque); **Australia:** Matthew Chan (Gosford Hospital), Kynan Feeney (St John of God Murdoch Hospital), Mathew George (Tamworth Hospital), Rohit Joshi (Lyell McEwin Hospital), Adnan Khattak (Fiona Stanley Hospital), David Leong (The Canberra Hospital), Benjamin Markman (Moorabbin Hospital), Sue-Anne McLachlan (St Vincent's Hospital), Adnan Nagrial (Blacktown Hospital), Kenneth O'Byrne (Princess Alexandra Hospital Brisbane); **Austria:** Thorsten Fuereeder (AKH Wien), Rainer Kolb (Klinikum Wels-Grieskirchen GmbH), Herbert Stoeger (Medizinische Universitätsklinik); **Belgium:** Benoit Colinet (Centre Hospitalier Notre-Dame - Reine Fabiola), Ingel Demedts (AZ Delta), Koenraad Deschepper (AZ Nikolaas), Veerle Surmont (UZ Gent), Jan Van Meerbeek (Antwerp University Hospital); **Brazil:** Luiz Araujo (INCA - Instituto Nacional de Cancer), Carlos Barrios (Hospital Sao Lucas da PUCRS), Gilberto De Castro (Instituto do Cancer do Estado de Sao Paulo ICESP), Fabio Franke (Associacao Hospital de Caridade de Ijuí), Carolina Haddad (Real E Benemerita Associacao Portuguesa de Beneficencia), Pedro Marchi (Fundacao Pio XII Hospital de Cancer de Barretos), Clarissa Mathias (Nucleo de Oncologia da Bahia), Thiago Oliveira (Fundacao Antonio Prudente-Hospital AC Camargo); **Canada:** Jean-Sebastien Aucoin (Centre intégré universitaire de santé et de services sociaux de la Mauricie-et-du-Centre-du-Québec), Victor Cohen (Jewish General Hospital), Felix Couture (CHU de Québec - Université Laval), Renee Lester (Dr. H. Bliss Murphy Cancer Centre), Katerine Marquis (CISSS du Bas-Saint-Laurent Hôpital Regional de Rimouski), Simon Martel (Institut Universitaire de Cardiologie et de Pneumologie de Québec - Université Laval), Michel Pavic (Centre intégré universitaire de santé et de service sociaux de l'estrie – CHUS), Randeep Sangha (Cross Cancer Institute), Mark Vincent (London Regional Cancer Program); **Chile:** Osvaldo Aren Frontera (Centro Internacional de Estudios Clinicos), Pablo Gonzalez Mella (Instituto Oncologico), Pamela Salman (Fundacion Arturo Lopez Perez); **Colombia:** Ricardo Bruges (Hospital Universitario San Ignacio), Andres Felipe Cardona Zorrilla (Administradora del Country S.A. - Clinica del Country), Alicia Quiroga (Hospital Pablo Tobon Uribe), Gustavo Rojas (Oncologos del Occidente SA); **Czech Republic:** Libor Havel (Pneumologicka klinika 1. LF a TN), Vitezslav Kolek (Klinika plicnich nemoci a tuberkulozy); **Finland:** Jussi Koivunen (Oulu University Hospital), Taneli Saariaho (Turku University Hospital); **France:** Clarisse Audigier-Valette (Hôpital Sainte Musse), Fabrice Barlesi (Hôpital Nord), Christos Chouaid (CHI de Creteil), Romain Corre (CHU Pontchaillou), Pierre Fournel (Institut de Cancérologie de la Loire), Radj Gervais (Centre Francois Baclesse), Marylise Ginoux (Hôpital Cardiologique Louis Pradel), Bertrand Mennecier (Nouvel Hôpital Civil CHU de Strasbourg), Judith Raimbourg (ICO

Paul Papin and Centre René Gauducheau), Luc Thiberville (Hôpital Charles Nicolle CHU de Rouen), Remi Veillon (Hôpital du Haut Leveque), Alain Vergnenegre (CHU de Limoges), Virginie Westeel (CHU Hôpital Jean Minjoz), Gerard Zalzman (Hôpital Bichat Claude Bernard); **Germany:** Helge Bischoff (Thoraxklinik-Heidelberg gGmbH), Peter Fix (Zentralklinik Bad Berka GmbH), Norbert Frickhofen (Dr.-Horst-Schmidt-Kliniken Wiesbaden), Wolfgang Gleiber (Universitätsklinikum Frankfurt), Christian Grohé (Evangelische Lungenklinik Berlin), Martin Kimmich (Klinik Schillerhöhe), Konrad Kokowski (Klinikum Bogenhausen), Susanne Lang (SRH Wald Klinikum Gera gGmbH), Martin Reck (Lung Clinic Grosshansdorf, Airway Research Center North [ARC�], member of the German Center for Lung Research [DZL]), Jens Schreiber (Universitätsklinikum Magdeburg A. o. R.), Martin Schuler (Universitätsklinikum Essen), Christian Schumann (Klinikverbund Kempten-Oberallgau), Wolfgang Schütte (Städtisches Krankenhaus Martha Maria Halle-Dolau), Monika Serke (Lungenklinik Hemer); **Greece:** Helena Linardou (A' Oncology Dept, Metropolitan Hospital), Parisi Makrantonakis (Thegenion Anticancer Hospital), Dimitrios Mavroudis (University Hospital Of Heraklion), Konstantinos Syrigos (Sotiria General Hospital); **Hungary:** István Albert (Matrai Gyogyintezet), György Losonczy (Pulmonologiai Klinika), Gyula Ostoros (Országos Korányi Tbc és Pulmonologiai Intezet); **Ireland:** Oscar Breathnach (Beaumont Hospital), Linda Coate (Midwestern Cancer Center), Sinead Cuffe (St. James's Hospital), Paul Donnellan (Galway University College Hospital); **Israel:** Jair Bar (Sheba Medical Center), Arnold Cyjon (Oncology Institute, Assaf Harofeh Medical Center), Maya Gottfried (Meir Medical Center), Hovav Nechushtan (Hadassah Medical Organization), Salomon Stemmer (Rabin Medical Center, Institute of Oncology); **Italy:** Andrea Ardizzoni (Azienda Ospedaliera S.Orsola-Malpighi), Roberta Bartolucci (Ospedale S.Maria), Lucia Bonomi (ASST Papa Giovanni XXIII), Federico Cappuzzo (Presidio Ospedaliero Di Ravenna), Rita Chiari (S.C. Di Oncologia Medica Azienda Ospedaliera Di Perugia), Francesco Cognetti (Ifo-Istituto Regina Elena), Filippo De Marinis (Istituto Europeo Di Oncologia), Marina Garassino (Istituto Nazionale Per Lo Studio E La Cura), Cesare Gridelli (Azienda Ospedaliera Moscati), Eliza Minenza (Ospedale Santa Maria della Misericordia); **Japan:** Koichi Azuma (Kurume University Hospital), Haruko Daga (Osaka City General Hospital), Yasuhito Fujisaka (Osaka Medical College Hospital), Tatsuro Fukuhara (Miyagi Cancer Center), Koichi Goto (National Cancer Center Hospital East), Masao Harada (Hokkaido Cancer Center), Akito Hata (Institute of Biomedical Research and Innovation Hospital), Toyoaki Hida (Aichi Cancer Center Hospital), Katsuyuki Hotta (Okayama University Hospital), Satoshi Ikeda (Kanagawa Cardiovascular and Respiratory Center), Akira Inoue (Tohoku University Hospital), Yasuo Iwamoto (Hiroshima City Hospital), Kazuo Kasahara (Kanazawa University Hospital), Ichiro Kinoshita (Hokkaido University Hospital), Kaoru Kubota (Nippon Medical School Hospital), Takayasu Kurata (Kansai Medical University Hospital), Koichi Minato (Gunma Prefectural Cancer Center), Tateaki Naito (Shizuoka Cancer Center), Makoto Nishio (The Cancer Institute Hospital of JFCR), Naoyuki Nogami (Shikoku Cancer Center), Yuichiro Ohe (National Cancer Center Hospital.), Hiroaki Okamoto (Yokohama Municipal Citizen's Hospital), Isamu Okamoto (Kyushu University Hospital), Tetsuya Okano

(Tokyo Medical University Hospital), Hideo Saka (National Hospital Organization Nagoya Medical Center), Hiroshi Sakai (Saitama Cancer Center), Miyako Satouchi (Hyogo Cancer Center), Shunichi Sugawara (Sendai Kosei Hospital), Masayuki Takeda (Kindai University Hospital), Yuichi Takiguchi (Chiba University Hospital), Hiroshi Tanaka (Niigata Cancer Center Hospital), Nobuyuki Yamamoto (Wakayama Medical University Hospital), Toshihide Yokoyama (Kurashiki Central Hospital); **Lebanon:** Marwan Ghosn (Hotel Dieu de France Hospital), Arafat Tfayli (American University of Beirut Medical Center); **Mexico:** Jorge Alatorre Alexander (Instituto Nacional de Enfermedades Respiratorias), Flor Bustamante Valles (Servicios Oncologicos de Chihuahua S. A. de C. V.), Saul Campos Gomez (Centro Oncologico Issemym), Emanuel De la Mora Jimenez (Instituto Jalisciense De Cancerologia), Paulina Gonzalez (Centro de Alta Especialidad en Reumatologia e Investigacion del Potosi S.C.), Osvaldo Hernandez Flores (Phylaxis Clinicas Research S de R. L. de C. V.), Francisco Medina-Soto (Axis Heilsa S de RL de CV), Mario Perez Martinez (Centro Medico Nacional Siglo XXI), Jessica Reyes Contreras (Centro de Atencion e Investigacion Cardiovascular del Potosi), Manuel Segura Gonzalez (Medical Care & Research), Leticia Vazquez Cortes (Centro Estatal de Atencion Oncologica); **Netherlands:** Joachim Aerts (Amphia Ziekenhuis [Amphia Hospital]), Sjaak Burgers (Antoni Van Leeuwenhoek Ziekenhuis), Robin Cornelissen (Erasmus MC Central Location), A Joop De Langen (Vu Medisch Centrum), Maggy Youssef-El Soud (Maxima Medisch Centrum); **Peru:** Fernando Hurtado De Mendoza (Clinica San Felipe- Unidad de Oncologia Medica), Luis Mas (Instituto Nacional De Enfermedades Neoplasicas), Carlos Vallejos (Oncocenter Peru SAC – Oncosalud); **Poland:** Ewa Kalinka-Warzocho (Regionalny Ośrodek Onkologiczny), Krzysztof Lesniewski-Kmak (Oddział Onkologii I Radioterapii Szpital Morski Im. PCK), Ireneusz Pawlak (ORTHOS Szpital Wielospecjalistyczny Sp. z o.o.), Adam Pluzanski (Klinika Nowotworow Pluca i Klatki Piersiowej), Rafal Suwinski (Centrum Onkologii - Inst. Im. M. Sklodowskiej-Curie O.W Gliwicach), Joanna Wojcik-Tomaszewska (Wojewodzkie Centrum Onkologii), Bogdan Zurawski (Ambulatorium Chemioterapii); **Republic of Korea:** Jin-Hyoung Kang (The Catholic University Of Korea, Seoul St. Mary's Hospital), Sang-We Kim (Asan Medical Center), Jong Seok Lee (Seoul National University Bundang Hospital), Ki Hyeong Lee (Chungbuk National University Hospital), Keunchil Park (Samsung Medical Center); **Romania:** Aurelia Alexandru (Institute Of Oncology "Prof.Dr.Alexandru Trestioreanu" Bucha), Tudor Ciuleanu (Prof. Dr. Ion Chiricuta Institute of Oncology and UMF Iuliu Hatieganu), Michael Schenker (SF Nectarie Oncology Center), Andrei Ungureanu (S.C. Radiotherapy Center Cluj S.R.L.); **Russian Federation:** Oleg Gladkov (Evimed LLC), Nina Karaseva (St. Petersburg City Clinical Oncology Dispensary), Konstantin Laktionov (N.N. Blokhin National Medical Research Center of Oncology), Alexander Luft (Leningrad Regional Clinical Hospital), Vladimir Moiseyenko (St.Petersburg Clinical & Practice Centre), Guzel Mukhametshina (Republican Clinical Oncology Dispensary), Dina Sakaeva (Bashkir Republican Clinical Oncology Dispensary); **South Africa:** Sze Chan (Sandton Oncology Medical Group), Lydia Dreosti (Department Of Medical Oncology, University Of Pretoria & Steve Biko Hospital), Bernardo Rapoport (The Medical Oncology Centre of

Rosebank), Daniel Rens (Vaal Triangle Oncology-Alberts, Bouwer & Jordaan Inc.); **Spain:** Reyes Bernabe Caro (Hospital Universitario Virgen del Rocio), Ana Blasco (Hospital General Univ de Valencia), Enric Carcereny Costa (Hosp Univ Germans Trias i Pujol), Alex Martinez Marti (Hospital General Universitari Vall D'Hebron), Luiz Paz-Ares, Santiago Ponce (Hospital Universitario Doce de Octubre), Mariano Provencio (Hospital Universitario Puerta de Hierro); **Switzerland:** Michael Mark (Kantonsspital Graubuenden), Andreas Mueller (Kantonsspital Winterthur), Solange Peters (Centre hospitalier universitaire Vaudois [CHUV]), Sacha Rothschild (Klinik für Onkologie); **Taiwan:** Gee-Chen Chang (Taichung Veterans General Hospital), Chao-Hua Chiu (Taipei Veterans General Hospital), Kang-Yun Lee (Taipei Medical University-Shuang Ho Hospital), Cheng-Ta Yang (Chang Gung Memorial Hospital-Linko), Chong-Jen Yu (National Taiwan University Hospital); **United Kingdom:** Samreen Ahmed (Leicester Royal Infirmary), David Chao (North Middlesex University Hospital), David Gilligan (Addenbrooke's Hospital), Louise Li (The James Cook University Hospital), Melanie Mackean (Edinburgh Cancer Centre), Gary Middleton (University Hospital Birmingham NHS Foundation Trust), Christian Ottensmeier (Southampton University Hospital NHS Trust), Sanjay Popat (Royal Marsden NHS Foundation Trust, Royal Marsden Hospital), James Spicer (Guy's & St Thomas' NHS Trust); **United States:** Wallace Akerley (Huntsman Cancer Institute at the University of Utah), Sherri Arledge (Southern Cancer Center, Inc.), Firas Badin (Baptist Health Lexington), Britt Bolemon (Greenville Health System), Hossein Borghaei (Fox Chase Cancer Center), Julie Brahmer (Sidney Kimmel Comprehensive Cancer Center at Johns Hopkins), Hongbin Chen (Roswell Park Cancer Institute), Afshin Dowlati (University Hospitals), Eric Gamboa (Kadlec Clinical Hematology and Oncology), David Gerber (University of Texas Southwestern Medical Center), Scott Gettinger (Yale University), Matthew Hellmann (Memorial Sloan Kettering Cancer Center), Leora Horn (Vanderbilt University Medical Center), Alan Kramer (California Pacific Medical Center), Philip Lowry (Guthrie Medical Group, P.C.), Daniel Morgensztern (Washington University School of Medicine), Suresh Nair (Lehigh Valley Health Network), Gregory Otterson (The Ohio State University), Raul Oyola (Northwest Georgia Oncology Centers, P.C.), Suresh Ramalingam (Winship Cancer Institute, Emory University), Robert Reilly (St. Mary Medical Center), Robert Siegel (St Francis Hospital), John Wrangle (Hollings Cancer Center), Ralph Zinner (Thomas Jefferson University)

## **Supplemental Methods**

### **Additional inclusion and exclusion criteria**

Prior adjuvant or neoadjuvant chemotherapy or prior definitive chemoradiation for locally advanced disease was allowed up to 6 months before enrollment. Prior palliative radiotherapy to non-central nervous system lesions must have been completed  $\geq 2$  weeks before randomization. Patients with known *EGFR* mutations or *ALK* translocations sensitive to targeted therapy, an autoimmune disease, or untreated central nervous system metastases were excluded. Patient with central nervous system metastases were eligible if they were adequately treated and had neurologically returned to baseline for  $\geq 2$  weeks before randomization. Patients had to be off glucocorticoids or on stable or decreasing doses of  $\leq 10$  mg daily prednisone (or equivalent) for  $\geq 2$  weeks before randomization.

### **Treatment beyond progression and overall survival follow-up**

Treatment continuation with nivolumab or nivolumab plus ipilimumab beyond progression was permitted if the patient had investigator-assessed clinical benefit and continued to tolerate treatment. Patients were followed for overall survival every 3 months via in-person or phone contact after discontinuation of study drug treatment.

### **PD-L1 analysis for patient selection**

Fresh or archival tumor-biopsy specimens obtained within 6 months before enrollment (and without the patient receiving any intervening systemic anti-cancer therapy) were tested for programmed death ligand 1 (PD-L1) by a centralized laboratory with the use of the anti-PD-L1 antibody (28-8 antibody).<sup>1</sup>

### **Tumor mutational burden analysis**

Tumor mutational burden (TMB) was assessed in archival or fresh formalin-fixed, paraffin-embedded tumor samples using the validated assay FoundationOne CDx™, which employs next-generation sequencing to detect substitutions, insertions and deletion (indels), and copy number alterations in 324 genes and select gene rearrangements.<sup>2</sup> TMB was calculated according to previously defined methods.<sup>3</sup> Briefly, TMB was defined as the number of somatic, coding, base substitution, and short indels per megabase of genome examined. All base substitutions and indels in the coding region of targeted genes, including synonymous mutations, were filtered for both oncogenic driver events according to COSMIC and germline status according to dbSNP and ExAC databases, in addition to a private database of rare germline events compiled in the Foundation Medicine clinical cohort. Additional filtering based upon a computational assessment of germline status using the SGZ (somatic-germline-zygosity) tool was also performed.<sup>4</sup> The mutation count following application of these filters was divided by the region counted (0.8 Mb) to yield mutations/Mb.



**Figure S1. Study Design**

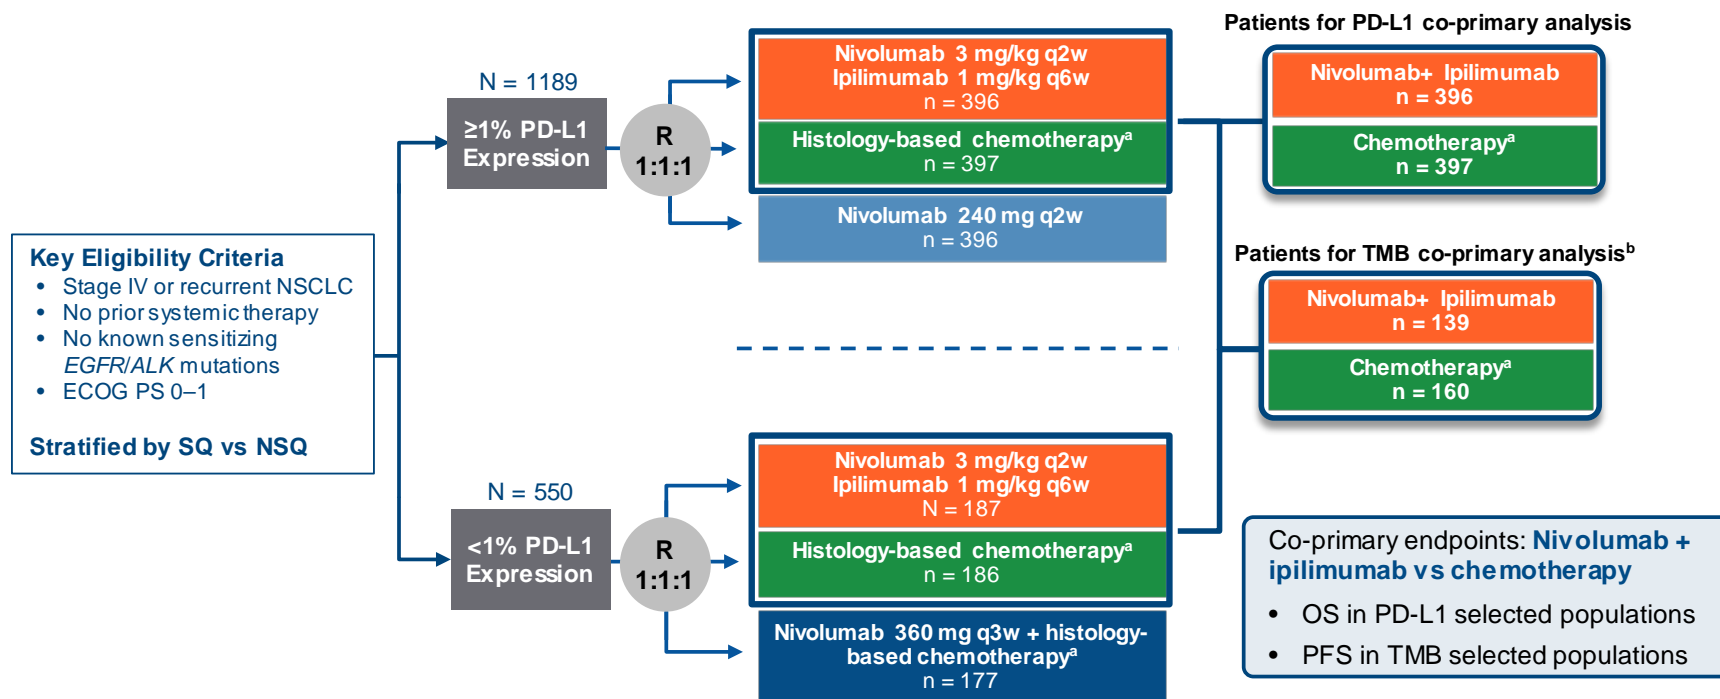

<sup>a</sup>Nonsquamous: pemetrexed (500 mg/m<sup>2</sup>) + cisplatin (75 mg/m<sup>2</sup>) or carboplatin (AUC 5 or 6), q3w for ≤4 cycles, with optional pemetrexed (500 mg/m<sup>2</sup>) maintenance following chemotherapy or nivolumab (360 mg q3w) + pemetrexed (500 mg/m<sup>2</sup>) maintenance following nivolumab + chemotherapy; squamous: gemcitabine (1000 or 1250 mg/m<sup>2</sup>) + cisplatin (75 mg/m<sup>2</sup>), or gemcitabine (1000 mg/m<sup>2</sup>) + carboplatin (AUC 5), q3w for ≤4 cycles

<sup>b</sup>The TMB co-primary analysis was conducted in the subset of patients randomized to nivolumab + ipilimumab or chemotherapy who had evaluable TMB  $\geq 10$  mutations/Mb

*ECOG PS* = Eastern Cooperative Oncology Group performance status; *OS* = overall survival; *NCLSC* = non–small-cell lung cancer; *NSQ* = nonsquamous; *PD-L1* = programmed death ligand 1; *PFS* = progression-free survival; *q2w* = every 2 weeks; *q3w* = every 3 weeks; *q6w* = every 6 weeks; *SQ* = squamous; *TMB* = tumor mutational burden

**Figure S2. Consolidated Standards of Reporting Trials (CONSORT) Diagram of Patient**

**Disposition**

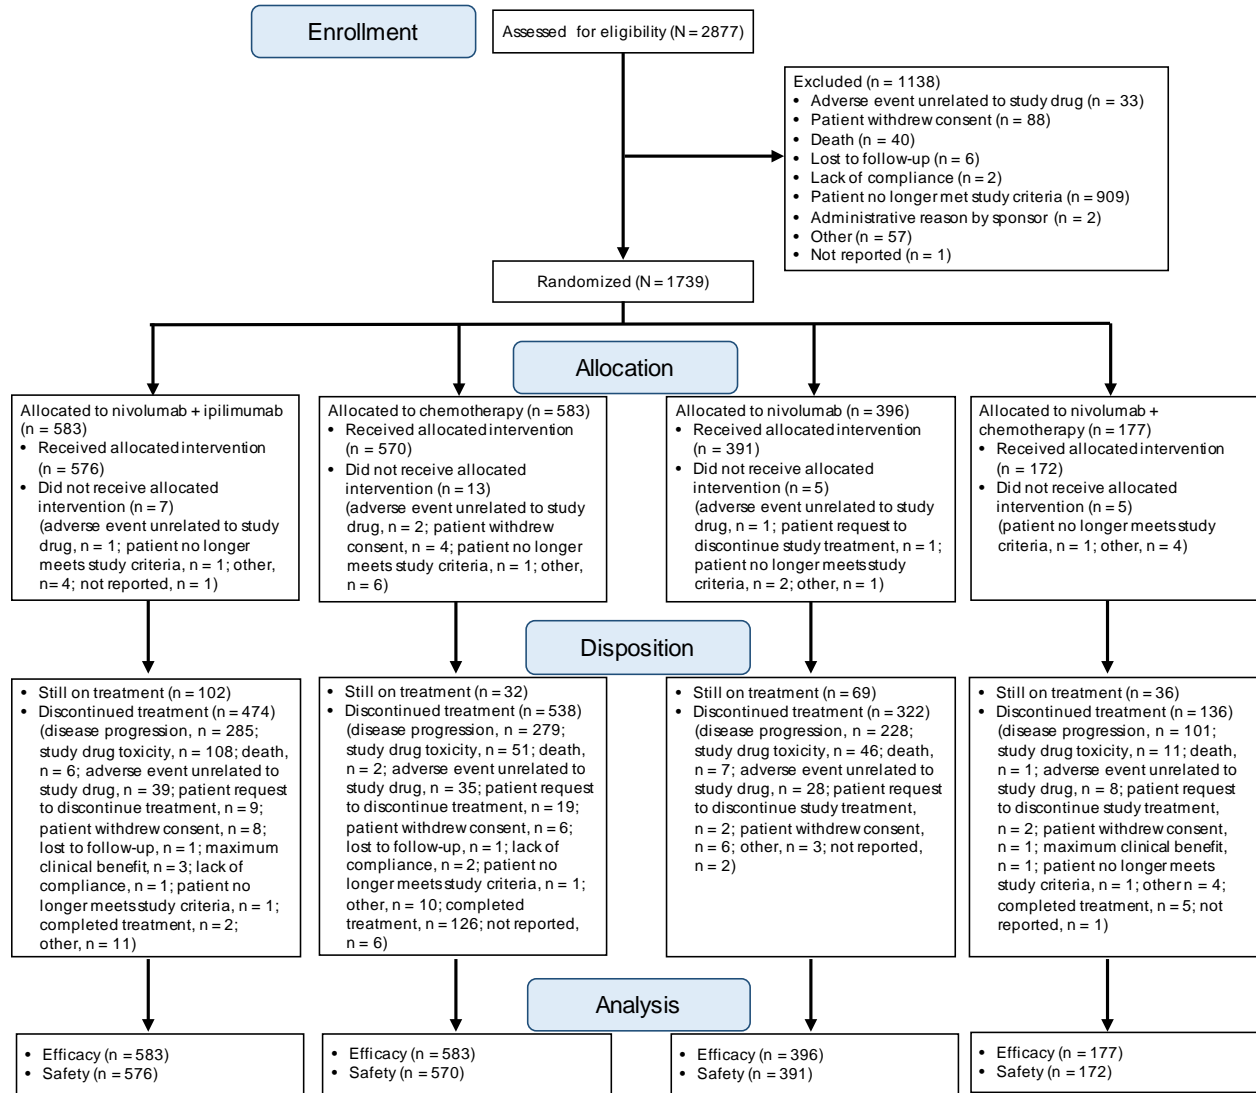

Figure S3. Scatterplot of TMB and PD-L1 Expression in All TMB-Evaluable Patients<sup>a</sup>

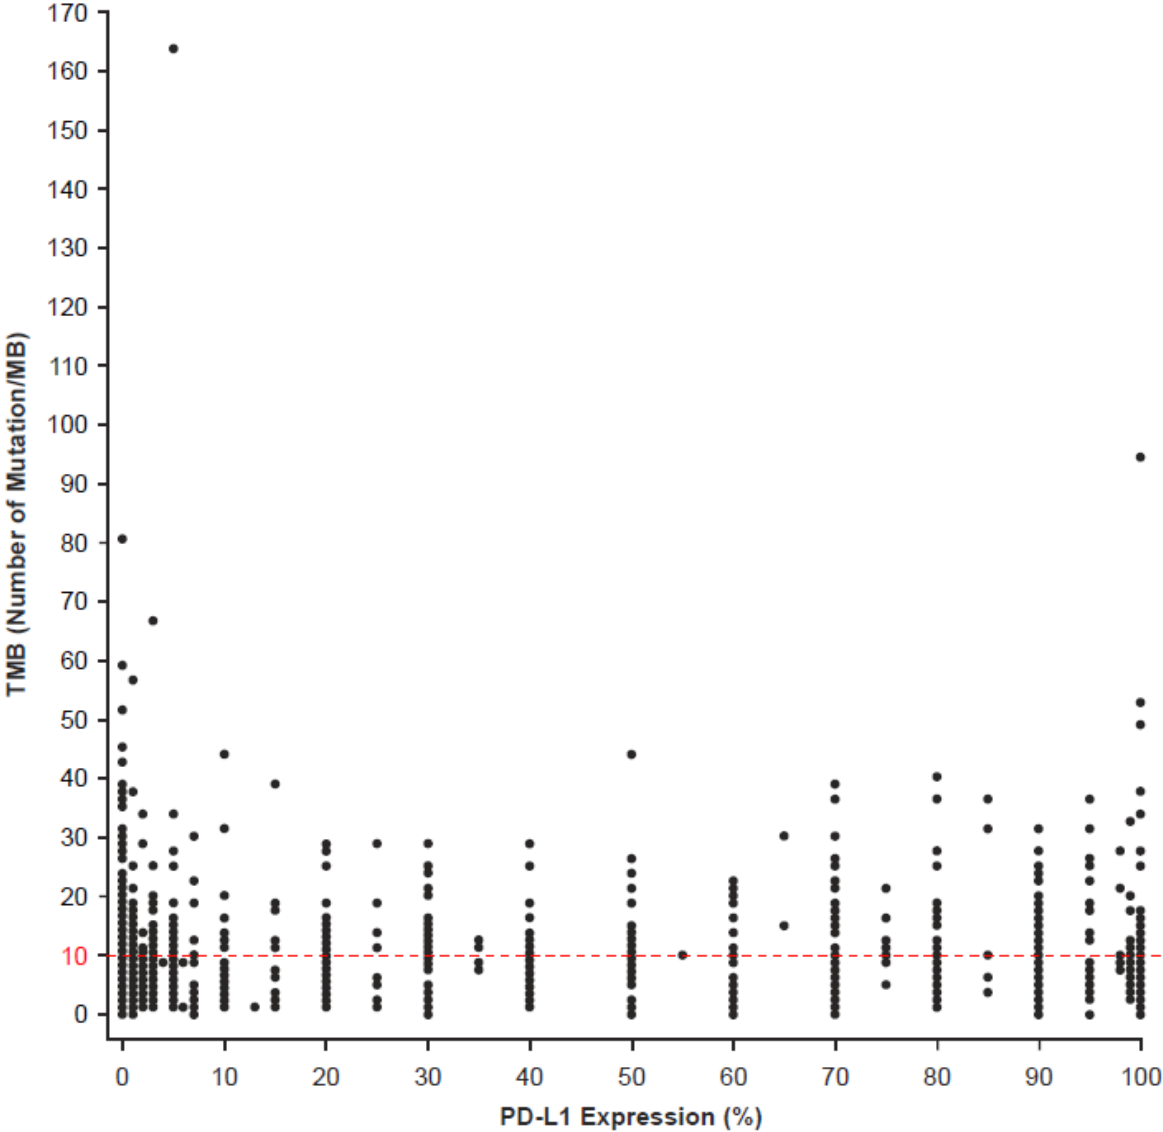

<sup>a</sup>Symbols (dots) in the scatterplot may represent multiple data points, especially for patients with <1% PD-L1 expression

**Figure S4. Progression-free Survival With Nivolumab Plus Ipilimumab Versus Chemotherapy in All Randomized and TMB-Evaluable Patients**

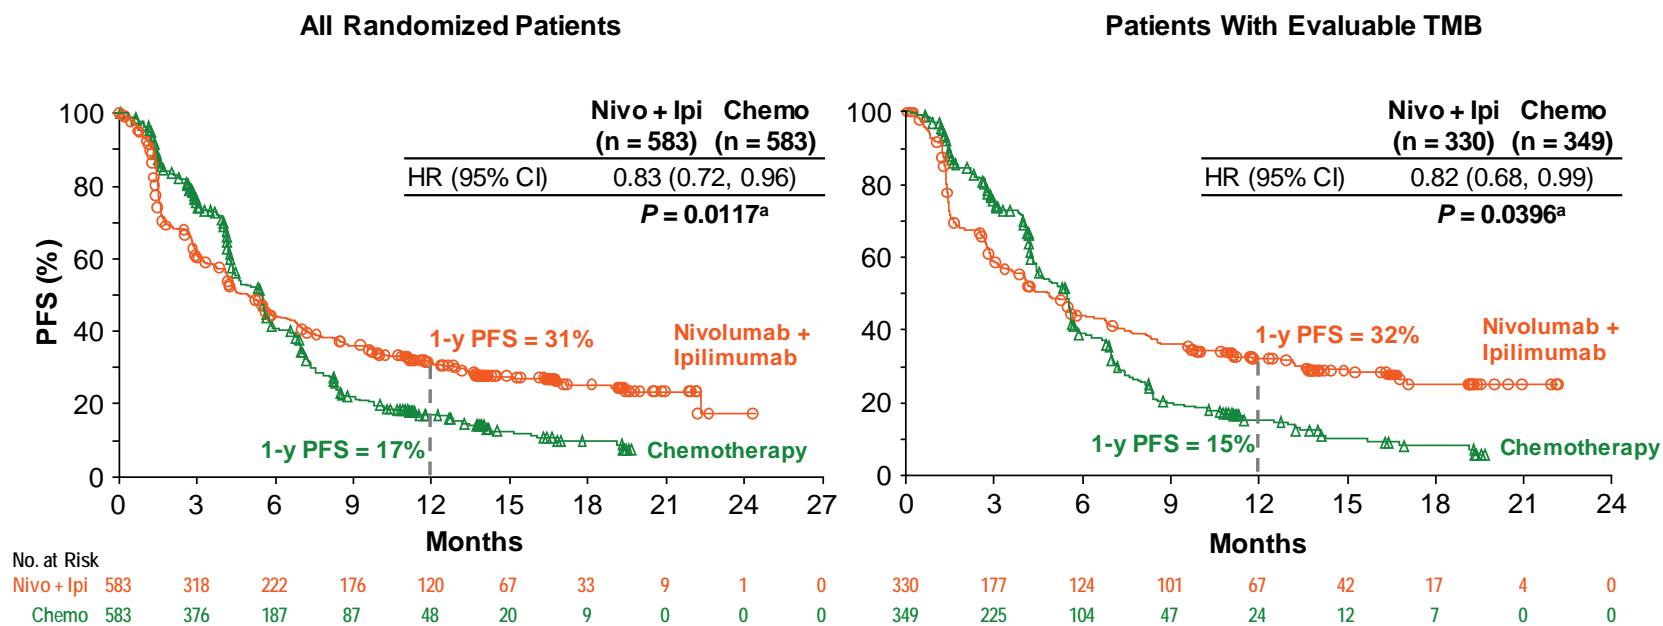

<sup>a</sup>P values are nominal and not adjusted for multiple comparisons

CI = confidence interval; HR = hazard ratio

**Figure S5. Progression-free Survival With Nivolumab Plus Ipilimumab Versus Chemotherapy in Patients With TMB <10 Mutations/Mb**

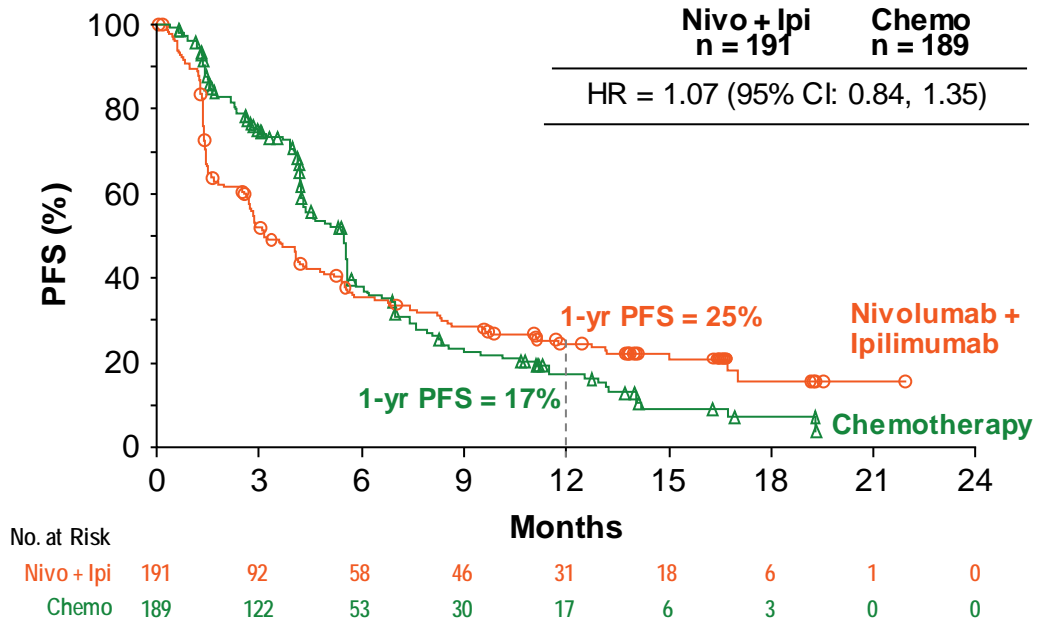

**Figure S6. Progression-free Survival With Nivolumab Monotherapy Versus Chemotherapy in Patients With TMB  $\geq 13$  Mutations/Mb and  $\geq 1\%$  Tumor PD-L1 Expression**

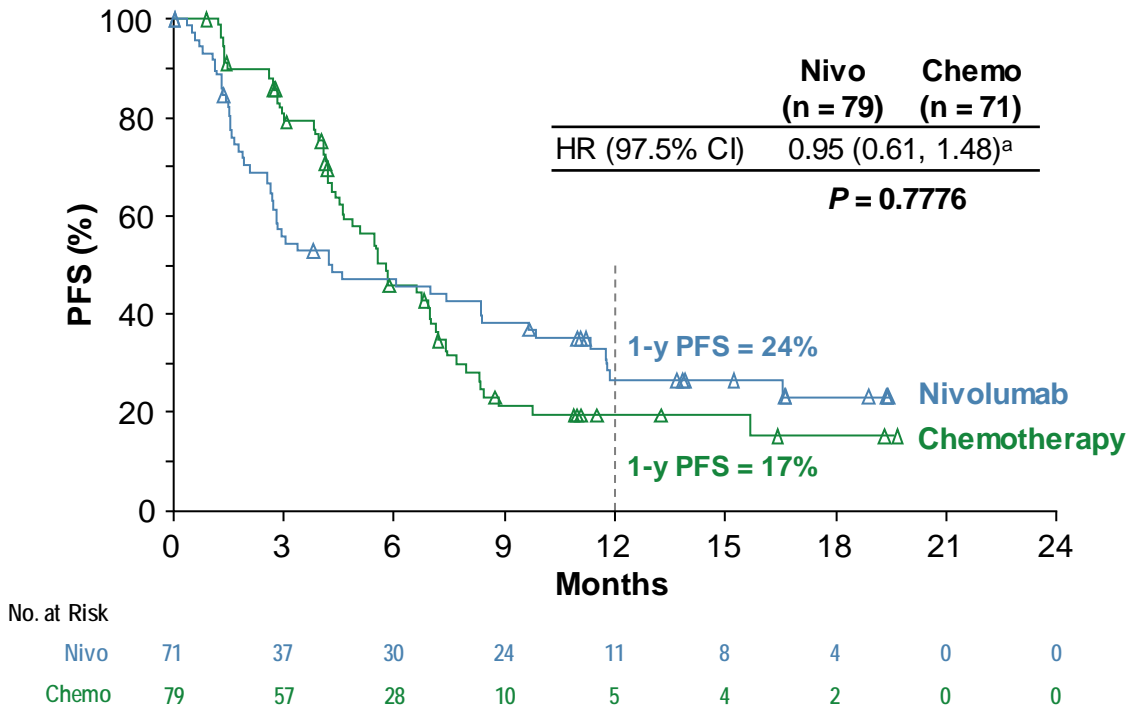

<sup>a</sup>HR (95% CI) = 0.95 (0.64, 1.40)

**Figure S7. Progression-free Survival With Nivolumab Plus Ipilimumab Versus Nivolumab Monotherapy and Chemotherapy<sup>a</sup> in Patients With TMB  $\geq 10$  Mutations/Mb and  $\geq 1\%$**

**Tumor PD-L1 Expression**

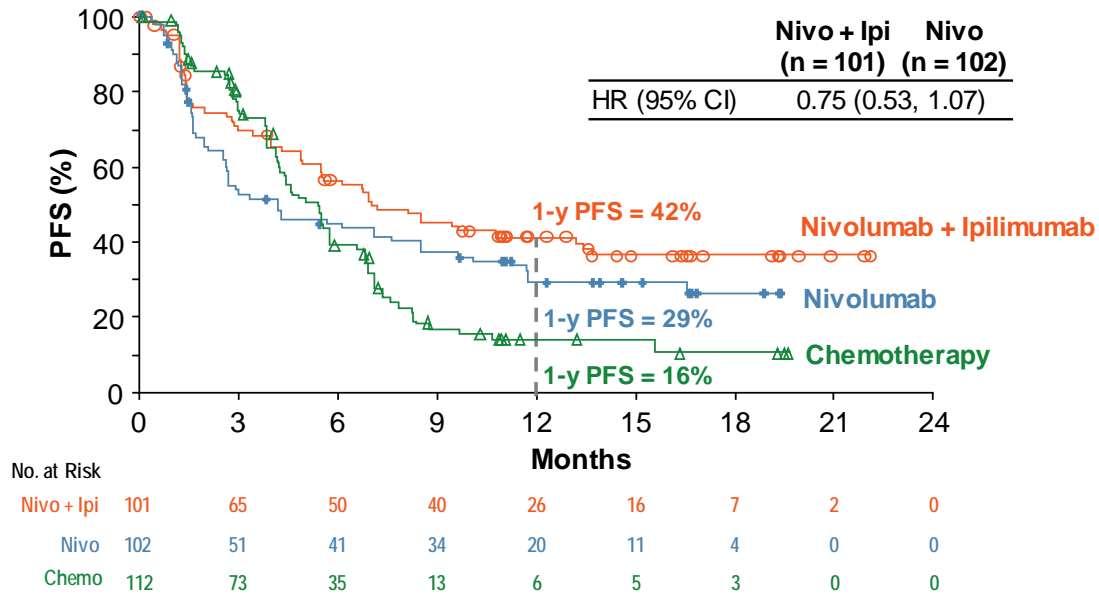

<sup>a</sup>HR (95% CI) = 0.62 (0.44, 0.88) for nivolumab + ipilimumab versus chemotherapy



**Figure S8. Treatment-Related Select Adverse Events<sup>a</sup> by Category With Nivolumab Plus Ipilimumab**

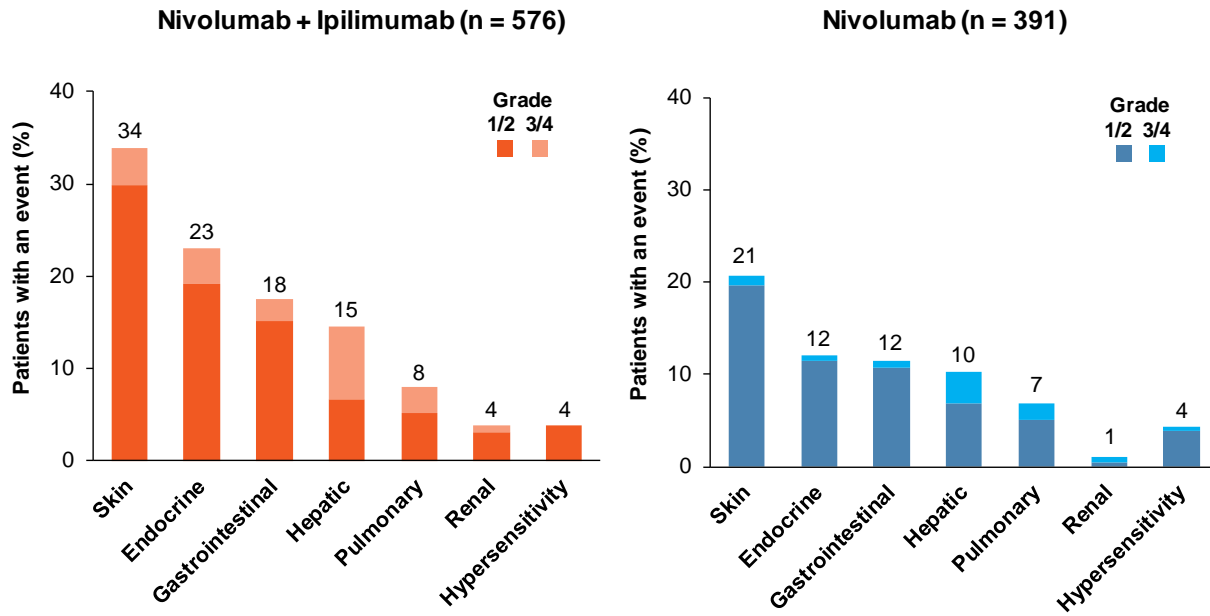

<sup>a</sup>Select adverse events are those with potential immunologic etiology that require frequent monitoring/intervention

**Table S1. Sample Size Throughout TMB Determination**

| <b>Patients, n (%)</b>             |            |
|------------------------------------|------------|
| Randomized <sup>a</sup>            | 1739 (100) |
| Samples available                  | 1649 (95)  |
| TMB-evaluable samples <sup>b</sup> | 1004 (58)  |

<sup>a</sup>Randomized patients include those from all treatment arms in part 1 (nivolumab + ipilimumab, nivolumab, chemotherapy, and nivolumab + chemotherapy arms)

<sup>b</sup>A pre-analytical quality control check was performed on all samples to flag inaccuracies comprised of but not limited to incorrect requisitions, receipt of insufficient sample, and duplicate samples. The FoundationOne CDx™ assay employs comprehensive quality control criteria, including the following critical characteristics: tumor purity, DNA sample size, tissue sample size, library construction size, and hybrid capture yields

**Table S2. Baseline Characteristics of All Randomized and TMB-Evaluable Patients**

|                            | All Randomized Patients          |                     |                        |                                                | TMB-Evaluable Patients           |                     |                        |                  |
|----------------------------|----------------------------------|---------------------|------------------------|------------------------------------------------|----------------------------------|---------------------|------------------------|------------------|
|                            | Nivolumab + Ipilimumab (n = 583) | Nivolumab (n = 396) | Chemotherapy (n = 583) | Total Study Population (N = 1739) <sup>a</sup> | Nivolumab + Ipilimumab (n = 330) | Nivolumab (n = 228) | Chemotherapy (n = 349) | Total (N = 1004) |
| <b>Median age, years</b>   | 64                               | 64                  | 64                     | 64                                             | 64                               | 64                  | 64                     | 64               |
| <b>Female, %</b>           | 33                               | 31                  | 34                     | 32                                             | 34                               | 31                  | 36                     | 33               |
| <b>ECOG PS, %</b>          |                                  |                     |                        |                                                |                                  |                     |                        |                  |
| 0                          | 35                               | 36                  | 33                     | 34                                             | 33                               | 32                  | 34                     | 33               |
| 1                          | 65                               | 64                  | 66                     | 65                                             | 67                               | 67                  | 65                     | 67               |
| ≥2                         | >1                               | 0                   | 1                      | <1                                             | <1                               | 0                   | 1                      | <1               |
| Not reported               | 0                                | <1                  | <1                     | <1                                             | 0                                | <1                  | <1                     | <1               |
| <b>Smoking status, %</b>   |                                  |                     |                        |                                                |                                  |                     |                        |                  |
| Current/former smoker      | 85                               | 86                  | 86                     | 85                                             | 86                               | 86                  | 87                     | 87               |
| Never smoker               | 14                               | 13                  | 13                     | 13                                             | 12                               | 12                  | 11                     | 12               |
| Unknown                    | 1                                | 1                   | 1                      | 1                                              | 2                                | 1                   | 1                      | 1                |
| <b>Histology, %</b>        |                                  |                     |                        |                                                |                                  |                     |                        |                  |
| Squamous                   | 28                               | 30                  | 28                     | 28                                             | 28                               | 29                  | 32                     | 29               |
| Nonsquamous                | 72                               | 70                  | 72                     | 72                                             | 72                               | 71                  | 68                     | 71               |
| <b>PD-L1 expression, %</b> |                                  |                     |                        |                                                |                                  |                     |                        |                  |
| <1%                        | 32                               | 0                   | 32                     | 32                                             | 27                               | 0                   | 31                     | 29               |
| ≥1%                        | 68                               | 100                 | 68                     | 68                                             | 73                               | 100                 | 69                     | 71               |

<sup>a</sup>Includes all treatments in part 1 of the study: nivolumab + ipilimumab, nivolumab, nivolumab + chemotherapy, and chemotherapy

**Table S3. End-of-Treatment Summary**

|                                                                 | All Treated Patients                      |                                | TMB $\geq$ 10 Mutations/Mb                |                                |
|-----------------------------------------------------------------|-------------------------------------------|--------------------------------|-------------------------------------------|--------------------------------|
|                                                                 | Nivolumab<br>+<br>Ipilimumab<br>(n = 576) | Chemo-<br>therapy<br>(n = 570) | Nivolumab<br>+<br>Ipilimumab<br>(n = 135) | Chemo-<br>therapy<br>(n = 159) |
| <b>Patients continuing in the treatment period, n (%)</b>       | 102 (17.7)                                | 32 (5.6)                       | 33 (24.2)                                 | 5 (3.1)                        |
| <b>Patients not continuing in the treatment period, n (%)</b>   | 474 (82.3)                                | 538 (94.4)                     | 102 (75.6)                                | 154 (96.9)                     |
| <b>Reason for not continuing in the treatment period, n (%)</b> |                                           |                                |                                           |                                |
| Disease progression                                             | 285 (49.5)                                | 279 (48.9)                     | 51 (37.8)                                 | 75 (47.2)                      |
| Study drug toxicity                                             | 108 (18.8)                                | 51 (8.9)                       | 35 (25.9)                                 | 14 (8.8)                       |
| Completed required treatment                                    | 2 (0.3)                                   | 126 (22.1)                     | 0                                         | 42 (26.4)                      |
| Death                                                           | 6 (1.0)                                   | 2 (0.4)                        | 1 (0.7)                                   | 0                              |
| Adverse event unrelated to study drug                           | 39 (6.8)                                  | 35 (6.1)                       | 7 (5.2)                                   | 9 (5.7)                        |
| Patient request to discontinue                                  | 9 (1.6)                                   | 19 (3.3)                       | 3 (2.2)                                   | 8 (5.0)                        |
| Patient withdrew consent                                        | 8 (1.4)                                   | 6 (1.1)                        | 1 (0.7)                                   | 1 (0.6)                        |
| Lost to follow-up                                               | 1 (0.2)                                   | 1 (0.2)                        | 0                                         | 0                              |
| Maximum clinical benefit                                        | 3 (0.5)                                   | 0                              | 1 (0.7)                                   | 0                              |
| Lack of compliance                                              | 1 (0.2)                                   | 2 (0.4)                        | 0                                         | 1 (0.6)                        |
| Patient no longer meets study criteria                          | 1 (0.2)                                   | 1 (0.2)                        | 0                                         | 0                              |
| Other                                                           | 11 (1.9)                                  | 10 (1.8)                       | 3 (2.2)                                   | 2 (1.3)                        |
| Not reported                                                    | 0                                         | 6 (1.1)                        | 0                                         | 2 (1.3)                        |

**Table S4. Subsequent Systemic Therapies in Patients With TMB  $\geq$ 10 Mutations/Mb<sup>a</sup>**

| <b>Patients, n (%)</b>          | <b>Nivolumab +<br/>Ipilimumab<br/>(n = 139)</b> | <b>Chemotherapy<br/>(n = 160)</b> |
|---------------------------------|-------------------------------------------------|-----------------------------------|
| Any subsequent systemic therapy | 23 (16.5)                                       | 69 (43.1)                         |
| Immunotherapy                   | 3 (2.2)                                         | 45 (28.1)                         |
| Anti-PD-1                       | 3 (2.2)                                         | 42 (26.3)                         |
| Nivolumab                       | 3 (2.2)                                         | 36 (22.5)                         |
| Pembrolizumab                   | 0                                               | 6 (3.8)                           |
| Anti-PD-L1 (atezolizumab)       | 0                                               | 1 (0.6)                           |
| Anti-CTLA-4 (ipilimumab)        | 0                                               | 5 (3.1) <sup>b</sup>              |
| Other immunotherapy             | 0                                               | 2 (1.3)                           |
| Targeted therapy                | 2 (1.4)                                         | 3 (1.9)                           |
| Chemotherapy                    | 22 (15.8)                                       | 33 (20.6)                         |

<sup>a</sup>At the time of database lock, 24% of patients treated with nivolumab + ipilimumab and 3% of those treated with chemotherapy were still on treatment

<sup>b</sup>All 5 patients received ipilimumab in combination with nivolumab

*CTLA-4* = cytotoxic T lymphocyte antigen-4; *PD-1* = programmed death 1

**Table S5. Treatment-Related Adverse Events Leading to Discontinuation of Nivolumab Plus Ipilimumab in  $\geq 2$  Patients**

| Event, n (%) <sup>a</sup>            | Nivolumab + Ipilimumab<br>(n = 576) |           |
|--------------------------------------|-------------------------------------|-----------|
|                                      | Any Grade                           | Grade 3–4 |
| Any event                            | 100 (17.4)                          | 69 (12.0) |
| Pneumonitis                          | 18 (3.1)                            | 10 (1.7)  |
| Diarrhea                             | 11 (1.9)                            | 8 (1.4)   |
| Aspartate aminotransferase increased | 7 (1.2)                             | 6 (1.0)   |
| Hepatitis                            | 6 (1.0)                             | 5 (0.9)   |
| Interstitial lung disease            | 6 (1.0)                             | 3 (0.5)   |
| Alanine aminotransferase increased   | 5 (0.9)                             | 4 (0.7)   |
| Colitis                              | 4 (0.7)                             | 3 (0.5)   |
| Adrenal insufficiency                | 4 (0.7)                             | 1 (0.2)   |
| Nausea                               | 3 (0.5)                             | 1 (0.2)   |
| Autoimmune hepatitis                 | 2 (0.3)                             | 2 (0.3)   |
| Gastritis                            | 2 (0.3)                             | 2 (0.3)   |
| Hypopituitarism                      | 2 (0.3)                             | 2 (0.3)   |
| Fatigue                              | 2 (0.3)                             | 1 (0.2)   |
| Hypophysitis                         | 2 (0.3)                             | 1 (0.2)   |
| Lipase increased                     | 2 (0.3)                             | 1 (0.2)   |
| Infusion-related reaction            | 2 (0.3)                             | 0         |

<sup>a</sup>Only includes adverse events leading to discontinuation of both nivolumab and ipilimumab

**Table S6. Treatment-Related Adverse Events Leading to Discontinuation of Nivolumab****Monotherapy in  $\geq 2$  Patients**

| <b>Event, n (%)</b>                | <b>Nivolumab<br/>(n = 391)</b> |                  |
|------------------------------------|--------------------------------|------------------|
|                                    | <b>Any Grade</b>               | <b>Grade 3–4</b> |
| Any event                          | 45 (11.5)                      | 27 (6.9)         |
| Pneumonitis                        | 9 (2.3)                        | 5 (1.3)          |
| Diarrhea                           | 4 (1.0)                        | 1 (0.3)          |
| Amylase increased                  | 3 (0.8)                        | 2 (0.5)          |
| Alanine aminotransferase increased | 2 (0.5)                        | 2 (0.5)          |
| Lipase increased                   | 2 (0.5)                        | 2 (0.5)          |

**Table S7. Treatment-Related Adverse Events Leading to Discontinuation of Chemotherapy  
in  $\geq 2$  Patients**

| Event, n (%)               | Chemotherapy<br>(n = 570) |           |
|----------------------------|---------------------------|-----------|
|                            | Any Grade                 | Grade 3–4 |
| Any event                  | 51 (8.9)                  | 28 (4.9)  |
| Anemia                     | 5 (0.9)                   | 2 (0.4)   |
| Fatigue                    | 5 (0.9)                   | 2 (0.4)   |
| Nausea                     | 3 (0.5)                   | 2 (0.4)   |
| Blood creatinine increased | 3 (0.5)                   | 0         |
| Neutrophil count decreased | 2 (0.4)                   | 2 (0.4)   |
| Pancytopenia               | 2 (0.4)                   | 2 (0.4)   |
| Platelet count decreased   | 2 (0.4)                   | 2 (0.4)   |
| Sepsis                     | 2 (0.4)                   | 2 (0.4)   |
| Acute kidney injury        | 2 (0.4)                   | 1 (0.2)   |
| Decreased appetite         | 2 (0.4)                   | 1 (0.2)   |
| Creatinine renal clearance | 2 (0.4)                   | 0         |



**Table S8. Treatment-Related Serious Adverse Events in  $\geq 2\%$  of Patients**

| <b>Event,<br/>n (%)</b>  | <b>Nivolumab +<br/>Ipilimumab<br/>(n = 576)</b> |                      | <b>Nivolumab<br/>(n = 391)</b> |                      | <b>Chemotherapy<br/>(n = 570)</b> |                      |
|--------------------------|-------------------------------------------------|----------------------|--------------------------------|----------------------|-----------------------------------|----------------------|
|                          | <b>Any<br/>Grade</b>                            | <b>Grade<br/>3–4</b> | <b>Any<br/>Grade</b>           | <b>Grade<br/>3–4</b> | <b>Any<br/>Grade</b>              | <b>Grade<br/>3–4</b> |
| Any event                | 138 (24.0)                                      | 102 (17.7)           | 42 (10.7)                      | 30 (7.7)             | 79 (13.9)                         | 61 (10.7)            |
| Pneumonitis              | 22 (3.8)                                        | 13 (2.3)             | 9 (2.3)                        | 6 (1.5)              | 3 (0.5)                           | 2 (0.4)              |
| Adrenal<br>insufficiency | 12 (2.1)                                        | 9 (1.6)              | 1 (0.3)                        | 1 (0.3)              | 0                                 | 0                    |
| Diarrhea                 | 12 (2.1)                                        | 6 (1.0)              | 2 (0.5)                        | 1 (0.3)              | 5 (0.9)                           | 2 (0.4)              |
| Anemia                   | 3 (0.5)                                         | 1 (0.2)              | 1 (0.3)                        | 1 (0.3)              | 14 (2.5)                          | 11 (1.9)             |

## References

1. Labeling: PD-L1 IHC 28-8 pharmDx. Dako North America, 2016. (Accessed October 20, 2016, at [http://www.accessdata.fda.gov/cdrh\\_docs/pdf15/P150027c.pdf](http://www.accessdata.fda.gov/cdrh_docs/pdf15/P150027c.pdf).)
2. FoundationOne CDx™ (website). Foundation Medicine, 2018. (Accessed February 8, 2018, at <https://www.foundationmedicine.com/genomic-testing/foundation-one-cdx>.)
3. Chalmers ZR, Connelly CF, Fabrizio D, et al. Analysis of 100,000 human cancer genomes reveals the landscape of tumor mutational burden. *Genome Med* 2017;9:34.
4. Sun JX, He Y, Sanford E, et al. A computational approach to distinguish somatic vs. germline origin of genomic alterations from deep sequencing of cancer specimens without a matched normal. *PLoS Comput Biol* 2018;14:e1005965.
